# Supplementary material for: Cook with Different Pots, but Similar Taste? Comparison of Phase Angle Using Bioelectrical Impedance Analysis According to Device Type and Examination Posture
Source: MDPI journal article supplement (doi:10.3390/life13051119), 2023-04-30
Supplement: s1 [file s1]

Supplementary Figure S1. The bland-Altman plot of 50kHz Whole body phase angle

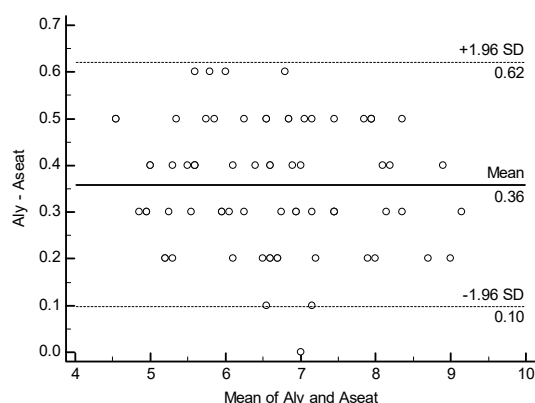

Method A Aly  
Method B Aseat

#### Differences

|                              |                   |
|------------------------------|-------------------|
| Sample size                  | 74                |
| Arithmetic mean              | 0.3581            |
| 95% CI                       | 0.3272 to 0.3890  |
| P ( $H_0$ : Mean=0)          | <0.0001           |
| Lower limit                  | 0.09654           |
| 95% CI                       | 0.04346 to 0.1496 |
| Upper limit                  | 0.6197            |
| 95% CI                       | 0.5666 to 0.6728  |
| Coefficient of Repeatability |                   |

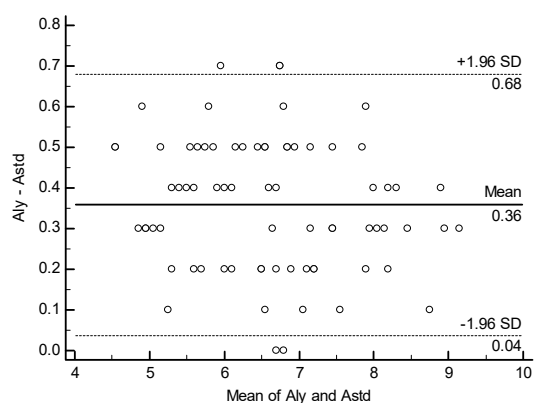

Method A Aly  
Method B Astd

#### Differences

|                              |                    |
|------------------------------|--------------------|
| Sample size                  | 74                 |
| Arithmetic mean              | 0.3581             |
| 95% CI                       | 0.3201 to 0.3961   |
| P ( $H_0$ : Mean=0)          | <0.0001            |
| Lower limit                  | 0.03694            |
| 95% CI                       | -0.02824 to 0.1021 |
| Upper limit                  | 0.6793             |
| 95% CI                       | 0.6141 to 0.7445   |
| Coefficient of Repeatability |                    |

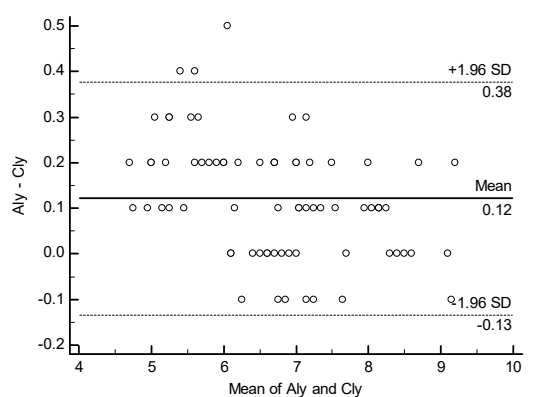

Method A Aly  
Method B Cly

#### Differences

|                              |                     |
|------------------------------|---------------------|
| Sample size                  | 74                  |
| Arithmetic mean              | 0.1216              |
| 95% CI                       | 0.09136 to 0.1519   |
| P ( $H_0$ : Mean=0)          | <0.0001             |
| Lower limit                  | -0.1344             |
| 95% CI                       | -0.1863 to -0.08243 |
| Upper limit                  | 0.3776              |
| 95% CI                       | 0.3257 to 0.4296    |
| Coefficient of Repeatability |                     |

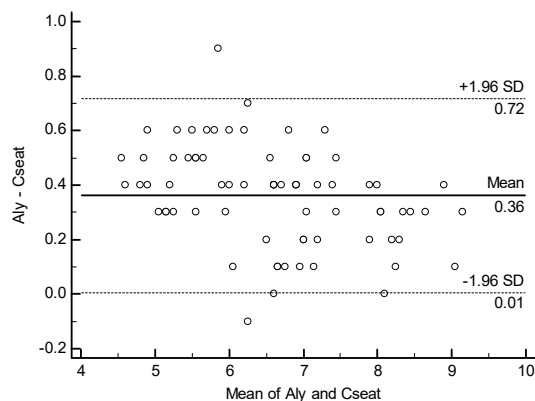

Method A Aly  
Method B Cseat

#### Differences

|                              |                     |
|------------------------------|---------------------|
| Sample size                  | 74                  |
| Arithmetic mean              | 0.3622              |
| 95% CI                       | 0.3200 to 0.4043    |
| P ( $H_0$ : Mean=0)          | <0.0001             |
| Lower limit                  | 0.005737            |
| 95% CI                       | -0.06659 to 0.07806 |
| Upper limit                  | 0.7186              |
| 95% CI                       | 0.6463 to 0.7909    |
| Coefficient of Repeatability |                     |

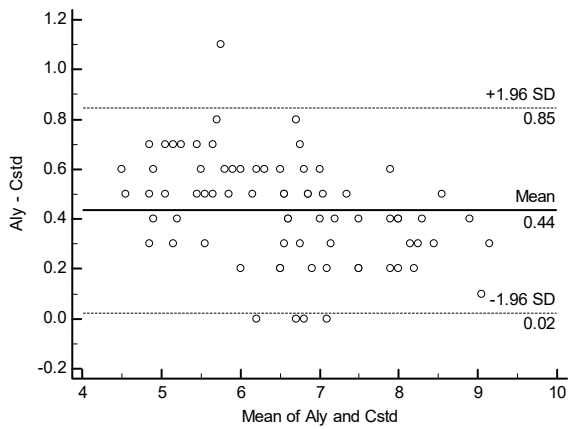

Method A Aly  
Method B Cstd

#### Differences

|                              |                    |
|------------------------------|--------------------|
| Sample size                  | 74                 |
| Arithmetic mean              | 0.4351             |
| 95% CI                       | 0.3866 to 0.4837   |
| P (H <sub>0</sub> : Mean=0)  | <0.0001            |
| Lower limit                  | 0.02422            |
| 95% CI                       | -0.05917 to 0.1076 |
| Upper limit                  | 0.8461             |
| 95% CI                       | 0.7627 to 0.9294   |
| Coefficient of Repeatability |                    |

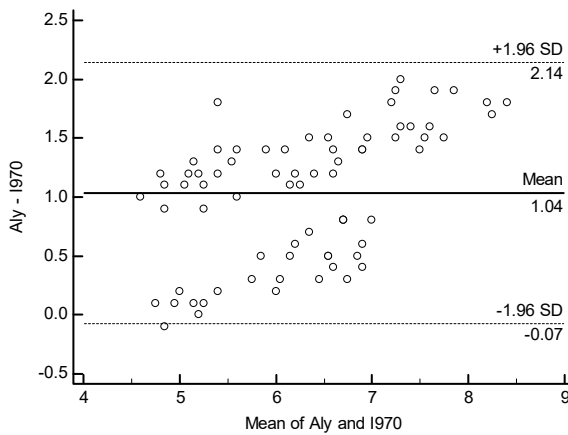

Method A Aly  
Method B 1970

#### Differences

|                              |                   |
|------------------------------|-------------------|
| Sample size                  | 74                |
| Arithmetic mean              | 1.0351            |
| 95% CI                       | 0.9043 to 1.1659  |
| P (H <sub>0</sub> : Mean=0)  | <0.0001           |
| Lower limit                  | -0.07144          |
| 95% CI                       | -0.2960 to 0.1531 |
| Upper limit                  | 2.1417            |
| 95% CI                       | 1.9172 to 2.3663  |
| Coefficient of Repeatability |                   |

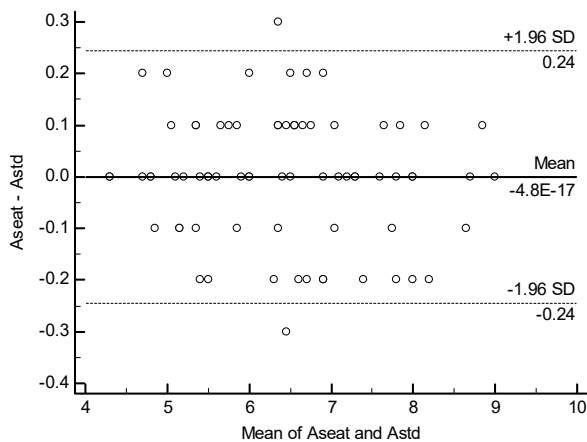

Method A Aseat  
Method B Astd

#### Differences

|                              |                     |
|------------------------------|---------------------|
| Sample size                  | 74                  |
| Arithmetic mean              | -4.801E-17          |
| 95% CI                       | -0.02895 to 0.02895 |
| P (H <sub>0</sub> : Mean=0)  | 1.0000              |
| Lower limit                  | -0.2449             |
| 95% CI                       | -0.2946 to -0.1952  |
| Upper limit                  | 0.2449              |
| 95% CI                       | 0.1952 to 0.2946    |
| Coefficient of Repeatability |                     |

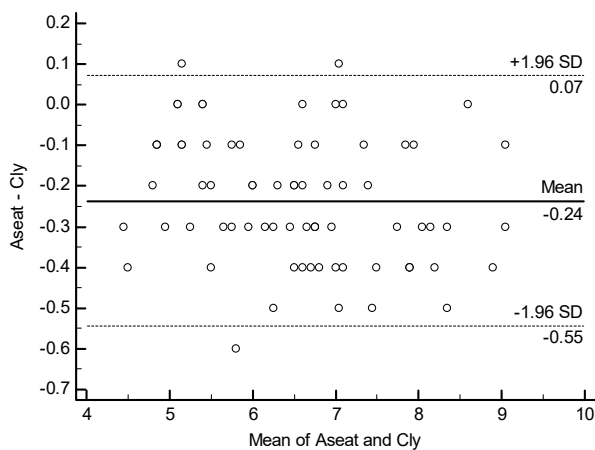

Method A Aseat  
Method B Cly

#### Differences

|                              |                    |
|------------------------------|--------------------|
| Sample size                  | 74                 |
| Arithmetic mean              | -0.2365            |
| 95% CI                       | -0.2730 to -0.2000 |
| P (H <sub>0</sub> : Mean=0)  | <0.0001            |
| Lower limit                  | -0.5452            |
| 95% CI                       | -0.6079 to -0.4826 |
| Upper limit                  | 0.07227            |
| 95% CI                       | 0.009614 to 0.1349 |
| Coefficient of Repeatability |                    |

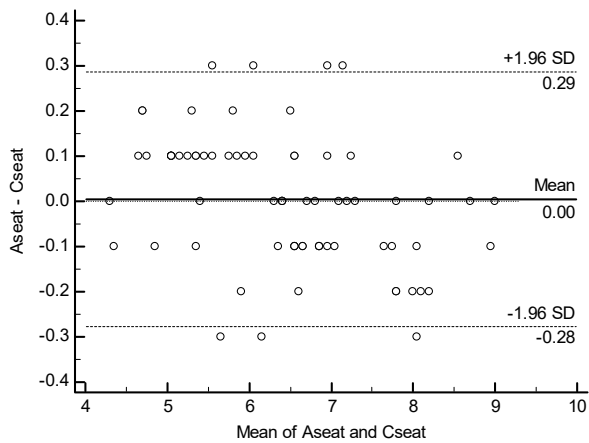

Method A    **Aseat**  
Method B    **Cseat**

#### Differences

|                              |                     |
|------------------------------|---------------------|
| Sample size                  | 74                  |
| Arithmetic mean              | 0.004054            |
| 95% CI                       | -0.02925 to 0.03736 |
| P (H <sub>0</sub> : Mean=0)  | 0.8090              |
| Lower limit                  | -0.2777             |
| 95% CI                       | -0.3349 to -0.2205  |
| Upper limit                  | 0.2858              |
| 95% CI                       | 0.2287 to 0.3430    |
| Coefficient of Repeatability |                     |

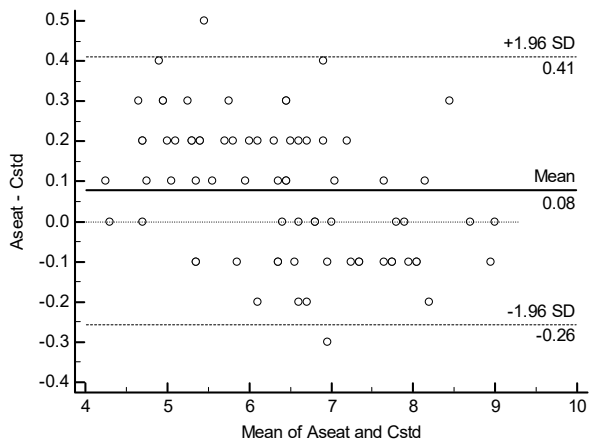

Method A    **Aseat**  
Method B    **Cstd**

#### Differences

|                              |                    |
|------------------------------|--------------------|
| Sample size                  | 74                 |
| Arithmetic mean              | 0.07703            |
| 95% CI                       | 0.03763 to 0.1164  |
| P (H <sub>0</sub> : Mean=0)  | 0.0002             |
| Lower limit                  | -0.2563            |
| 95% CI                       | -0.3239 to -0.1886 |
| Upper limit                  | 0.4103             |
| 95% CI                       | 0.3427 to 0.4780   |
| Coefficient of Repeatability |                    |

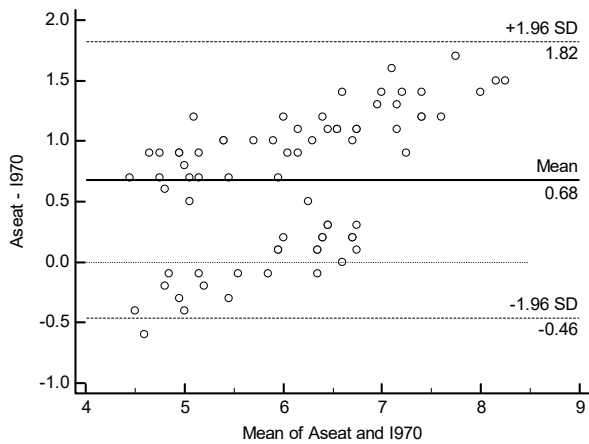

Method A    **Aseat**  
Method B    **I970**

#### Differences

|                              |                    |
|------------------------------|--------------------|
| Sample size                  | 74                 |
| Arithmetic mean              | 0.6770             |
| 95% CI                       | 0.5421 to 0.8119   |
| P (H <sub>0</sub> : Mean=0)  | <0.0001            |
| Lower limit                  | -0.4642            |
| 95% CI                       | -0.6958 to -0.2327 |
| Upper limit                  | 1.8183             |
| 95% CI                       | 1.5867 to 2.0499   |
| Coefficient of Repeatability |                    |

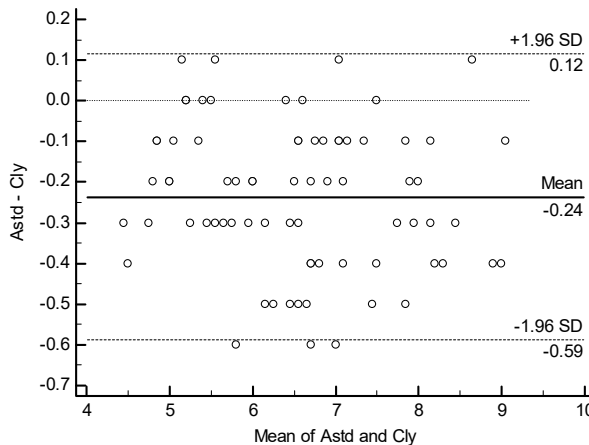

Method A    **Astd**  
Method B    **Cly**

#### Differences

|                              |                    |
|------------------------------|--------------------|
| Sample size                  | 74                 |
| Arithmetic mean              | -0.2365            |
| 95% CI                       | -0.2781 to -0.1949 |
| P (H <sub>0</sub> : Mean=0)  | <0.0001            |
| Lower limit                  | -0.5883            |
| 95% CI                       | -0.6596 to -0.5169 |
| Upper limit                  | 0.1153             |
| 95% CI                       | 0.04391 to 0.1867  |
| Coefficient of Repeatability |                    |

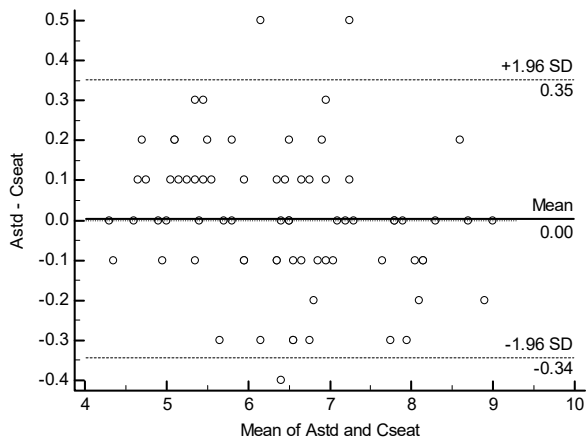

Method A    Astd  
Method B    Cseat

#### Differences

|                              |                     |
|------------------------------|---------------------|
| Sample size                  | 74                  |
| Arithmetic mean              | 0.004054            |
| 95% CI                       | -0.03715 to 0.04526 |
| P (H <sub>0</sub> : Mean=0)  | 0.8451              |
| Lower limit                  | -0.3445             |
| 95% CI                       | -0.4152 to -0.2738  |
| Upper limit                  | 0.3526              |
| 95% CI                       | 0.2819 to 0.4234    |
| Coefficient of Repeatability |                     |

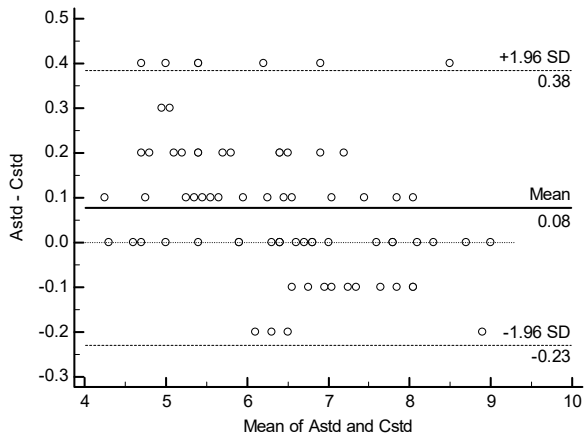

Method A    Astd  
Method B    Cstd

#### Differences

|                              |                    |
|------------------------------|--------------------|
| Sample size                  | 74                 |
| Arithmetic mean              | 0.07703            |
| 95% CI                       | 0.04074 to 0.1133  |
| P (H <sub>0</sub> : Mean=0)  | 0.0001             |
| Lower limit                  | -0.2300            |
| 95% CI                       | -0.2923 to -0.1677 |
| Upper limit                  | 0.3840             |
| 95% CI                       | 0.3217 to 0.4463   |
| Coefficient of Repeatability |                    |

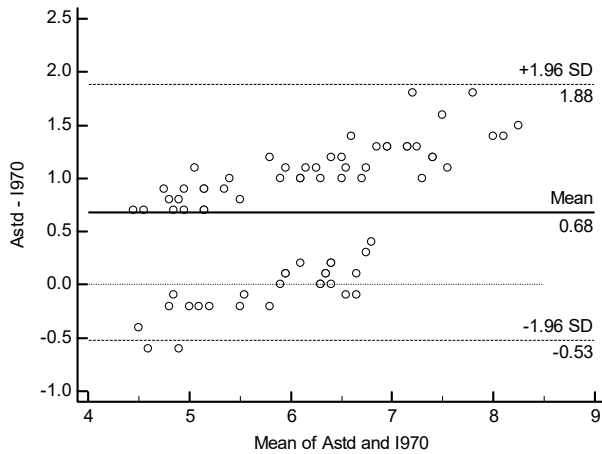

Method A    Astd  
Method B    1970

#### Differences

|                              |                    |
|------------------------------|--------------------|
| Sample size                  | 74                 |
| Arithmetic mean              | 0.6770             |
| 95% CI                       | 0.5347 to 0.8194   |
| P (H <sub>0</sub> : Mean=0)  | <0.0001            |
| Lower limit                  | -0.5271            |
| 95% CI                       | -0.7714 to -0.2827 |
| Upper limit                  | 1.8811             |
| 95% CI                       | 1.6368 to 2.1255   |
| Coefficient of Repeatability |                    |

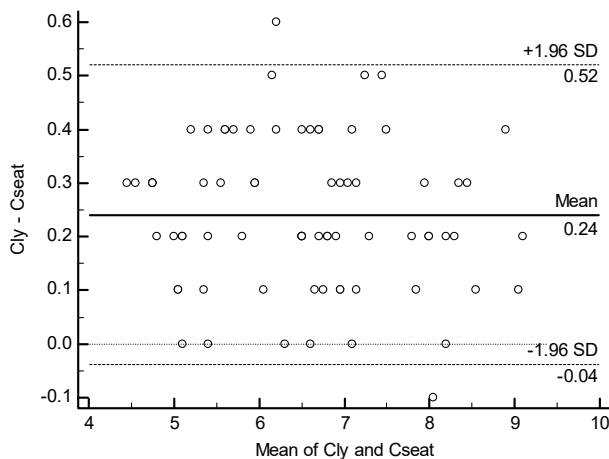

Method A    Cly  
Method B    Cseat

#### Differences

|                              |                     |
|------------------------------|---------------------|
| Sample size                  | 74                  |
| Arithmetic mean              | 0.2405              |
| 95% CI                       | 0.2076 to 0.2735    |
| P (H <sub>0</sub> : Mean=0)  | <0.0001             |
| Lower limit                  | -0.03838            |
| 95% CI                       | -0.09498 to 0.01822 |
| Upper limit                  | 0.5195              |
| 95% CI                       | 0.4629 to 0.5761    |
| Coefficient of Repeatability |                     |

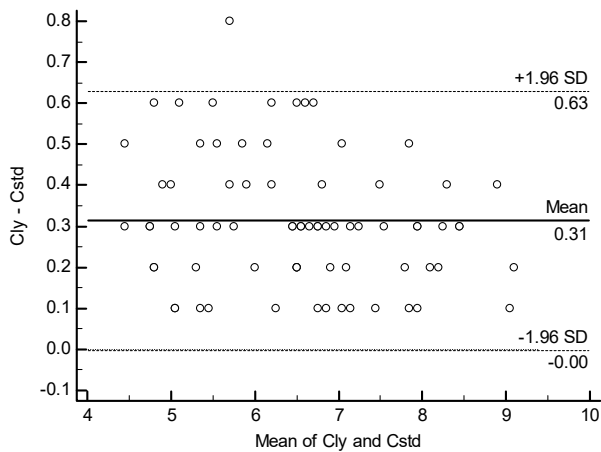

Method A Cly  
Method B Cstd

#### Differences

|                              |                     |
|------------------------------|---------------------|
| Sample size                  | 74                  |
| Arithmetic mean              | 0.3135              |
| 95% CI                       | 0.2763 to 0.3508    |
| P (H <sub>0</sub> : Mean=0)  | <0.0001             |
| Lower limit                  | -0.001567           |
| 95% CI                       | -0.06550 to 0.06237 |
| Upper limit                  | 0.6286              |
| 95% CI                       | 0.5647 to 0.6925    |
| Coefficient of Repeatability |                     |

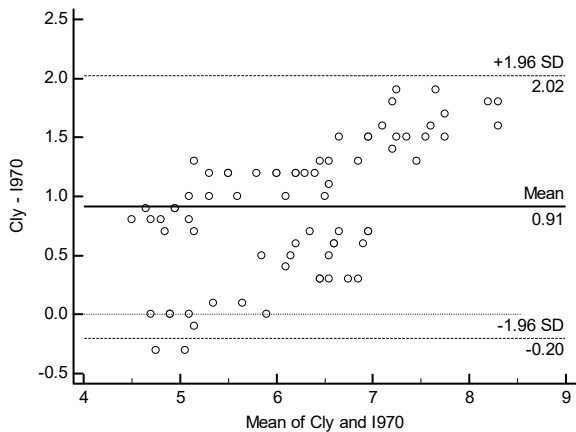

Method A Cly  
Method B I970

#### Differences

|                              |                    |
|------------------------------|--------------------|
| Sample size                  | 74                 |
| Arithmetic mean              | 0.9135             |
| 95% CI                       | 0.7822 to 1.0449   |
| P (H <sub>0</sub> : Mean=0)  | <0.0001            |
| Lower limit                  | -0.1978            |
| 95% CI                       | -0.4233 to 0.02775 |
| Upper limit                  | 2.0248             |
| 95% CI                       | 1.7993 to 2.2503   |
| Coefficient of Repeatability |                    |

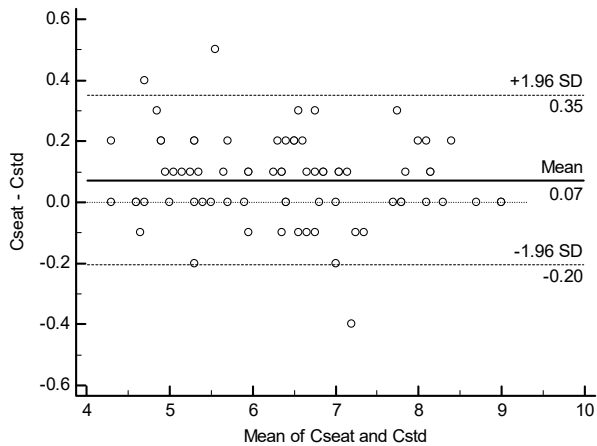

Method A Cseat  
Method B Cstd

#### Differences

|                              |                    |
|------------------------------|--------------------|
| Sample size                  | 74                 |
| Arithmetic mean              | 0.07297            |
| 95% CI                       | 0.04014 to 0.1058  |
| P (H <sub>0</sub> : Mean=0)  | <0.0001            |
| Lower limit                  | -0.2048            |
| 95% CI                       | -0.2611 to -0.1484 |
| Upper limit                  | 0.3507             |
| 95% CI                       | 0.2944 to 0.4071   |
| Coefficient of Repeatability |                    |

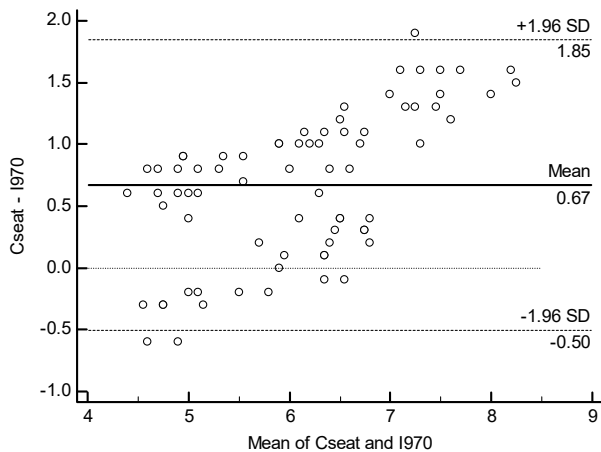

Method A Cseat  
Method B I970

#### Differences

|                              |                    |
|------------------------------|--------------------|
| Sample size                  | 74                 |
| Arithmetic mean              | 0.6730             |
| 95% CI                       | 0.5341 to 0.8119   |
| P (H <sub>0</sub> : Mean=0)  | <0.0001            |
| Lower limit                  | -0.5023            |
| 95% CI                       | -0.7407 to -0.2638 |
| Upper limit                  | 1.8482             |
| 95% CI                       | 1.6097 to 2.0867   |
| Coefficient of Repeatability |                    |

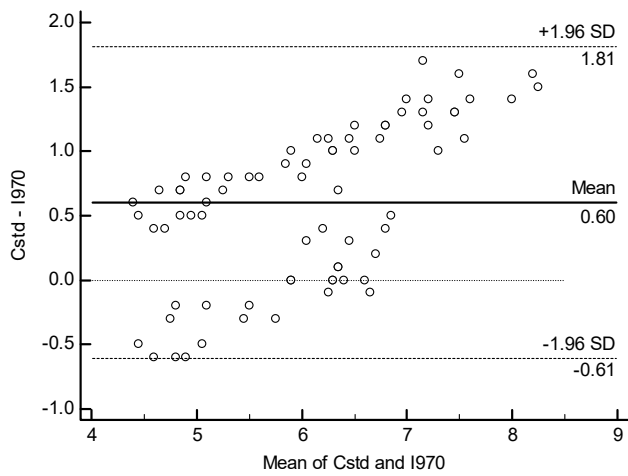

Method A Cstd

Method B I970

#### Differences

|                              |                    |
|------------------------------|--------------------|
| Sample size                  | 74                 |
| Arithmetic mean              | 0.6000             |
| 95% CI                       | 0.4571 to 0.7429   |
| P (H <sub>0</sub> : Mean=0)  | <0.0001            |
| Lower limit                  | -0.6091            |
| 95% CI                       | -0.8545 to -0.3637 |
| Upper limit                  | 1.8091             |
| 95% CI                       | 1.5637 to 2.0545   |
| Coefficient of Repeatability |                    |
